# Supplementary material for: Comprehensive Analysis of Soluble Mediator Profiles in Congenital CMV Infection Using an MCMV Model
Source: MDPI journal article supplement (doi:10.3390/v16020208), 2024-01-30
Supplement: s1 [file s1]

Supplementary Materials:

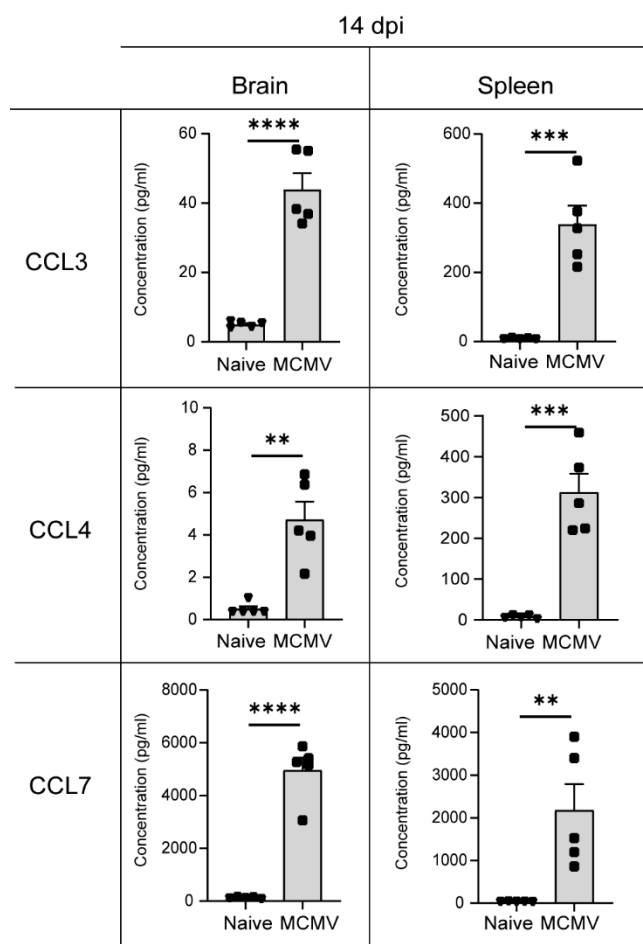

**Supplement Figure S1. Prolonged immune activation: CCL3, CCL4, and CCL7 levels remain elevated at 14 days post-infection in C57BL/6J mice.** C57BL/6J mice infected on postnatal day 1 underwent organ harvesting and lysis at 14 dpi. CCL3, CCL4, and CCL7 concentrations are expressed as pg/ml. Mean values + SEM are shown (n = 4–5). Unpaired two-tailed Student's test was used. A value of P > 0.05 was considered not statistically significant (ns); \*\*, P < 0.01; \*\*\*, P < 0.001; \*\*\*\*, P < 0.0001.

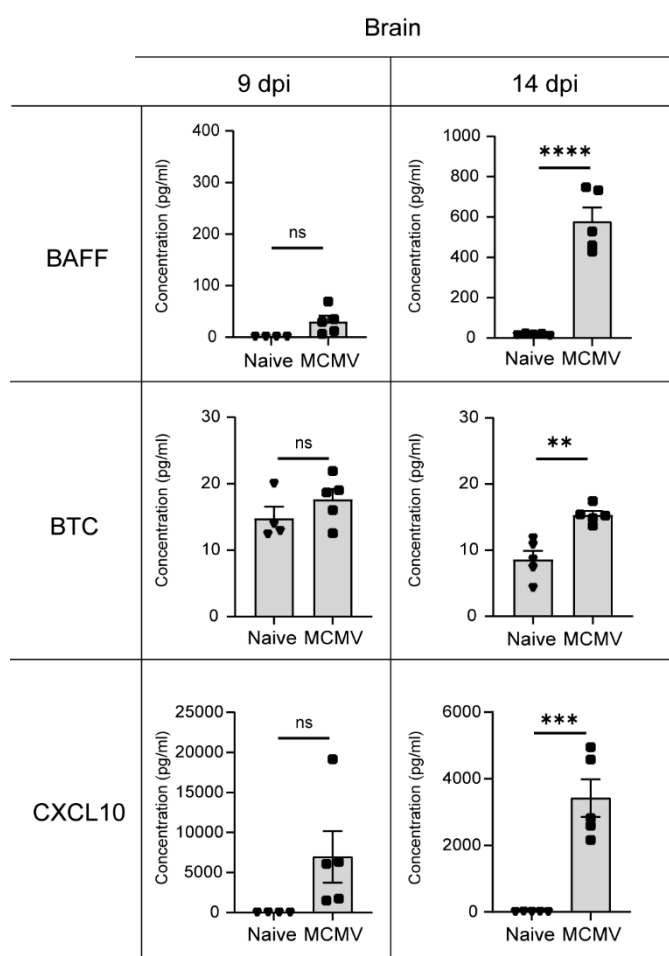

**Supplement Figure S2. BAFF, BTC and CXCL10 levels in the brains of MCMV-infected mice.** C57BL/6J mice were infected on postnatal day 1. Brain tissue was harvested and lysed at indicated timepoints. BAFF, BTC and CXCL10 concentrations were measured at 9 and 14 dpi. All concentrations are expressed as pg/ml. Mean values + SEM are shown (n = 4–6). Unpaired two-tailed Student's test was used. A value of  $P > 0.05$  was considered not statistically significant (ns); \*\*,  $P < 0.01$ ; \*\*\*,  $P < 0.001$ .

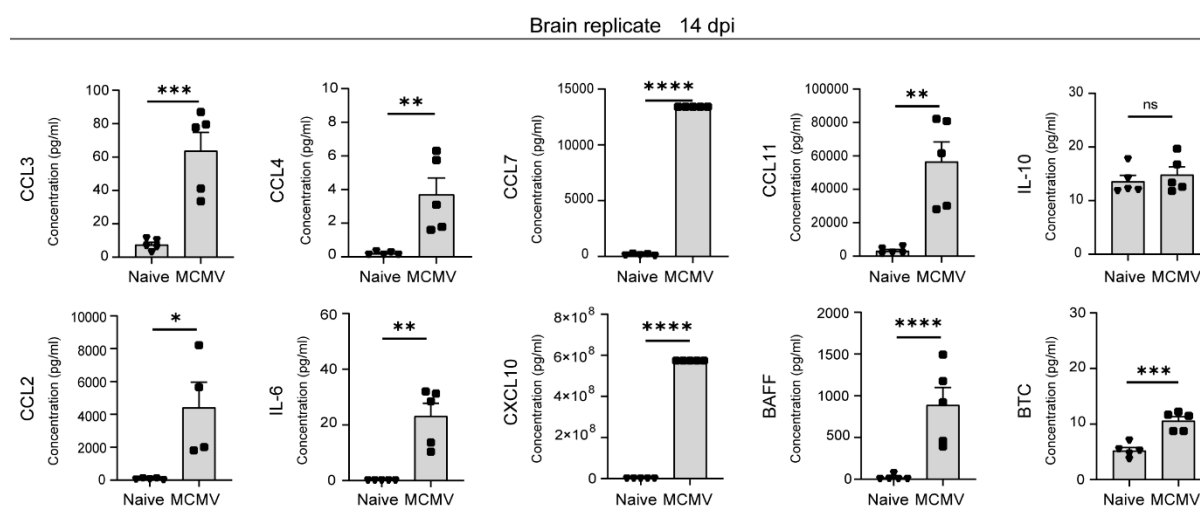

**Supplement Figure S3. Biological replicate of cytokines and chemokines at 14 dpi in C57BL/6J mice.** C57BL/6J mice infected on postnatal day 1 underwent organ harvesting and lysis at 14 dpi. All concentrations are expressed as pg/ml. Mean values + SEM are shown (n = 4–5). Unpaired two-tailed Student’s test was used. A value of  $P > 0.05$  was considered not statistically significant (ns); \*,  $P < 0.05$ ; \*\*,  $P < 0.01$ ; \*\*\*,  $P < 0.001$ ; \*\*\*\*,  $P < 0.0001$ .
